# Supplementary material for: Bacteria-Mediated RNA Interference for Management of Plagiodera versicolora (Coleoptera: Chrysomelidae)
Source: PubMed Central journal article supplement (PMC6955681; doi:10.3390/insects10120415), 2019-11-21
Supplement: insects-10-00415-s001.pdf [file insects-10-00415-s001.pdf]

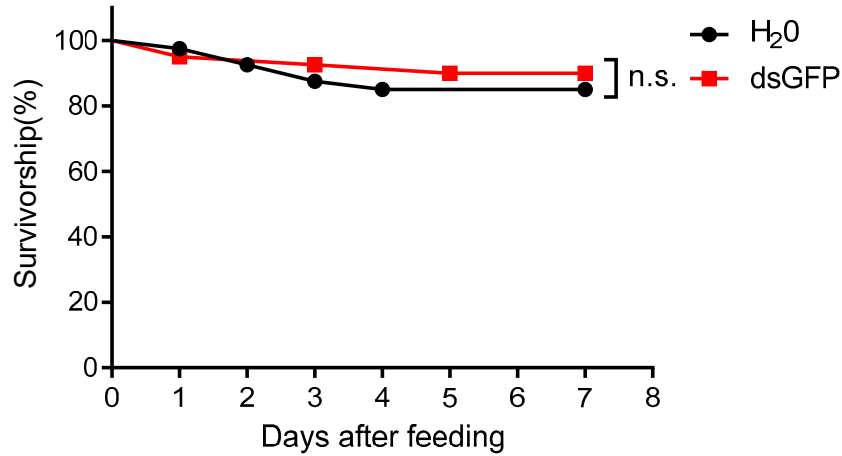

**Figure 1.** No effects of dsGFP-expressing bacteria on the survivorship of the 1<sup>st</sup> instar larvae. Not significant (n.s.) difference between the survival of H<sub>2</sub>O-treated and dsGFP-treated *P. versicolora* larvae.

**Table S1.** Oligonucleotide sequences used in this study (homologous sequences are underlined).

| Primer        | Sequence (5'-3')                                         | Amplicon (bp) |
|---------------|----------------------------------------------------------|---------------|
| F-dsRNA-GFP   | <u>ACTATAGGGAGACCGGCAGATCTGAAGTGGAGAGGGTGAAGGTGAT</u>    | 381           |
| R-dsRNA-GFP   | <u>GGTACCGGGCCCCCCTCGAGGTCGCTTGTGCGCCATGATGTATAC</u>     |               |
| F-dsRNA-ACT   | <u>ACTATAGGGAGACCGGCAGATCTGAACCCCTGCCATGTACGTCGCT</u>    | 368           |
| R-dsRNA-ACT   | <u>GGTACCGGGCCCCCCTCGAGGTCGCGGATGGTGTGATGACTTGTCCG</u>   |               |
| F-dsRNA-CACT  | <u>ACTATAGGGAGACCGGCAGATCTGACCAACTTCTCGACATGCACAA</u>    | 346           |
| R-dsRNA-CACT  | <u>GGTACCGGGCCCCCCTCGAGGTCGACCAACTGTCTGAGAACGTGCA</u>    |               |
| F-dsRNA-HSP70 | <u>ACTATAGGGAGACCGGCAGATCTGAGCTCTCACACTCGCGCGCACTT</u>   | 335           |
| R-dsRNA-HSP70 | <u>GGTACCGGGCCCCCCTCGAGGTCGTGAAGAACCAGCTCGGCGACAA</u>    |               |
| F-dsRNA-SHI   | <u>ACTATAGGGAGACCGGCAGATCTGACCCGAGCTCAAGAGGCAGGT</u>     | 351           |
| R-dsRNA-SHI   | <u>GGTACCGGGCCCCCCTCGAGGTCGACCCGCTGTAGATTTCCACCAC</u>    |               |
| F-dsRNA-SNAP  | <u>ACTATAGGGAGACCGGCAGATCTGATTGAGAAGGCATTTGTTAGCTGAA</u> | 373           |
| R-dsRNA-SNAP  | <u>GGTACCGGGCCCCCCTCGAGGTCGAATGTTACCAAAGAGCAGCAAATC</u>  |               |
| F-dsRNA-SRP54 | <u>ACTATAGGGAGACCGGCAGATCTGAATGTGTTACCTGTGCCTATG</u>     | 340           |
| R-dsRNA-RP54  | <u>GGTACCGGGCCCCCCTCGAGGTCGTGGATCCTGTGGTTATCGCT</u>      |               |
| F-qPCR-ACT    | <u>CGTGACTTGACCGACTACCT</u>                              | 118           |
| R-qPCR-ACT    | <u>CGAGAGCGACATAGCAGAGT</u>                              |               |
| F-qPCR-CACT   | <u>CAGCTATCAAGGTCATTTCG</u>                              | 117           |
| R-qPCR-CACT   | <u>ACCAACTGTCTGAGAACG</u>                                |               |
| F-qPCR-HSC70  | <u>CTGGTACAACCTGGCGATA</u>                               | 101           |
| R-qPCR-HSC70  | <u>AGTGGCTGGAGGATAACC</u>                                |               |
| F-qPCR-RPS18  | <u>CTTCTCGTCGGAGCATTCT</u>                               | 110           |
| R-qPCR-RPS18  | <u>GTTGCGCTTAAGTGCATCAA</u>                              |               |
| F-qPCR-SHI    | <u>TCAAGAGGCAGGTGGAGAC</u>                               | 87            |
| R-qPCR-SHI    | <u>TCTTCGGCACCAAGTCCTT</u>                               |               |
| F-qPCR-SNAP   | <u>AACAGTTCACTGCCTCATTGAT</u>                            | 86            |
| R-qPCR-SNAP   | <u>TGGTGCCAGACATGATGCT</u>                               |               |
| F-qPCR-SRP54  | <u>ACTCCTCCTGCTTATGTCTACC</u>                            | 98            |
| R-qPCR-SRP54  | <u>TCCTGTGGTTATCGCTCAAGA</u>                             |               |
